# Supplementary material for: Directivity of Coseismic Ionospheric Disturbances Propagation Following the 2016 West Sumatra Earthquake Using Three-Dimensional Tomography GNSS-TEC
Source: MDPI journal article supplement (doi:10.3390/atmos13091532), 2022-09-19
Supplement: s1 [file s1]

## Supplementary Materials:

Mokhamad Nur Cahyadi <sup>1,\*</sup>, Deasy Arisa <sup>2</sup>, Ihsan Naufal Muafiry <sup>3</sup>, Buldan Muslim <sup>4</sup>, Ririn Wuri Rahayu <sup>1</sup>, Meilfan Eka Putra <sup>1</sup>, Mega Wulansari <sup>1</sup>, Bambang Setiadi <sup>5</sup>, Andria Arisal <sup>5</sup>, Pakhrur Razi <sup>6</sup> and Syachrul Arief <sup>7</sup>

<sup>1</sup> Geomatics Engineering Department, Institut Teknologi Sepuluh Nopember, Surabaya 60111, Indonesia

<sup>2</sup> Research Center for Geological Disaster, National Research and Innovation Agency, BRIN, Bandung 40135, Indonesia

<sup>3</sup> Survey and Mapping Department, Politeknik Sinar Mas Berau Coal, Berau 77315, Indonesia

<sup>4</sup> Research Center for Geospatial, National Research and Innovation Agency (BRIN), Bandung 40173, Indonesia

<sup>5</sup> Research Center for Data and Information Sciences, National Research and Innovation Agency (BRIN), Bandung 40135, Indonesia

<sup>6</sup> Department of Physics, Universitas Negeri Padang, UNP, Padang 25171, Indonesia

<sup>7</sup> Geospatial Information Agency, BIG, Bogor 16911, Indonesia

\* Correspondence: cahyadi@geodesy.its.ac.id

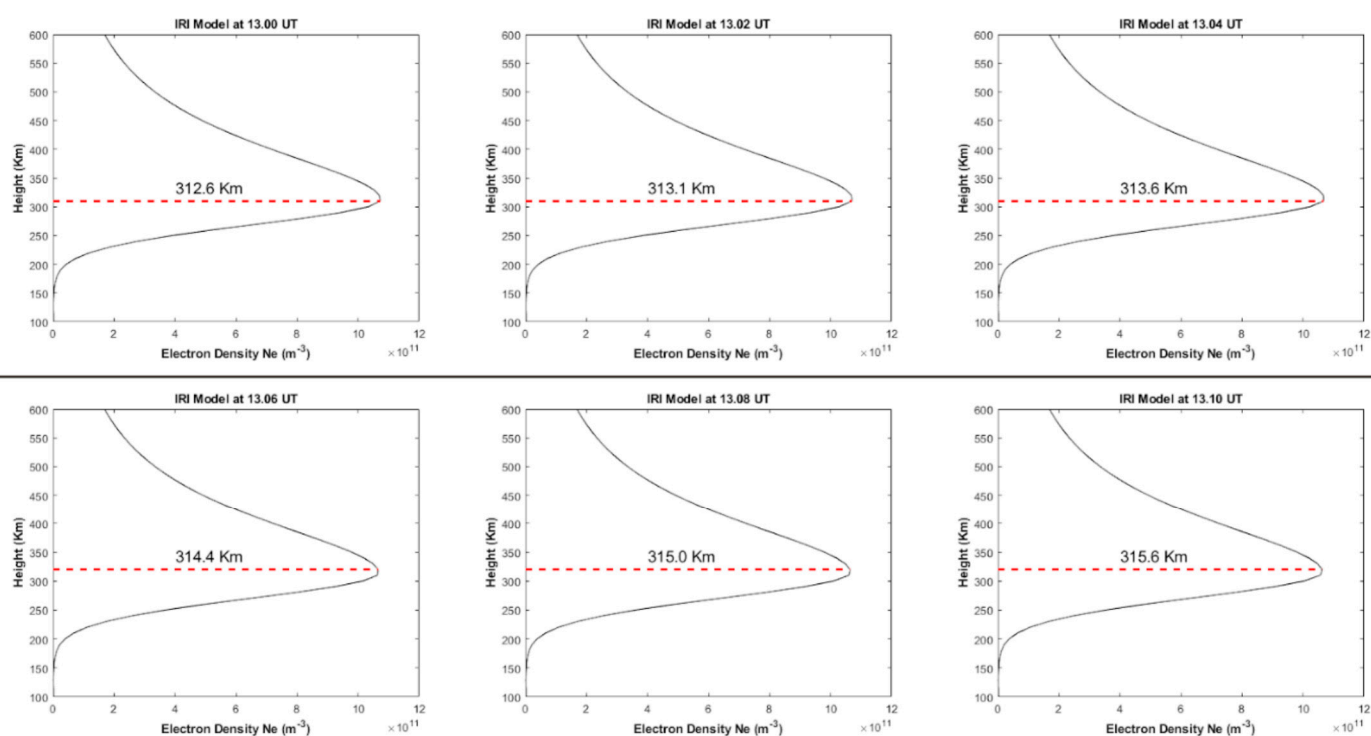

**Figure S1.** The vertical electron density profiles were reconstructed over the epicenter at six epochs (13.00 - 13.10 UT with intervals every 2 minutes) from the IRI model (<https://irimodel.org/>, accessed on 23 June 2022).

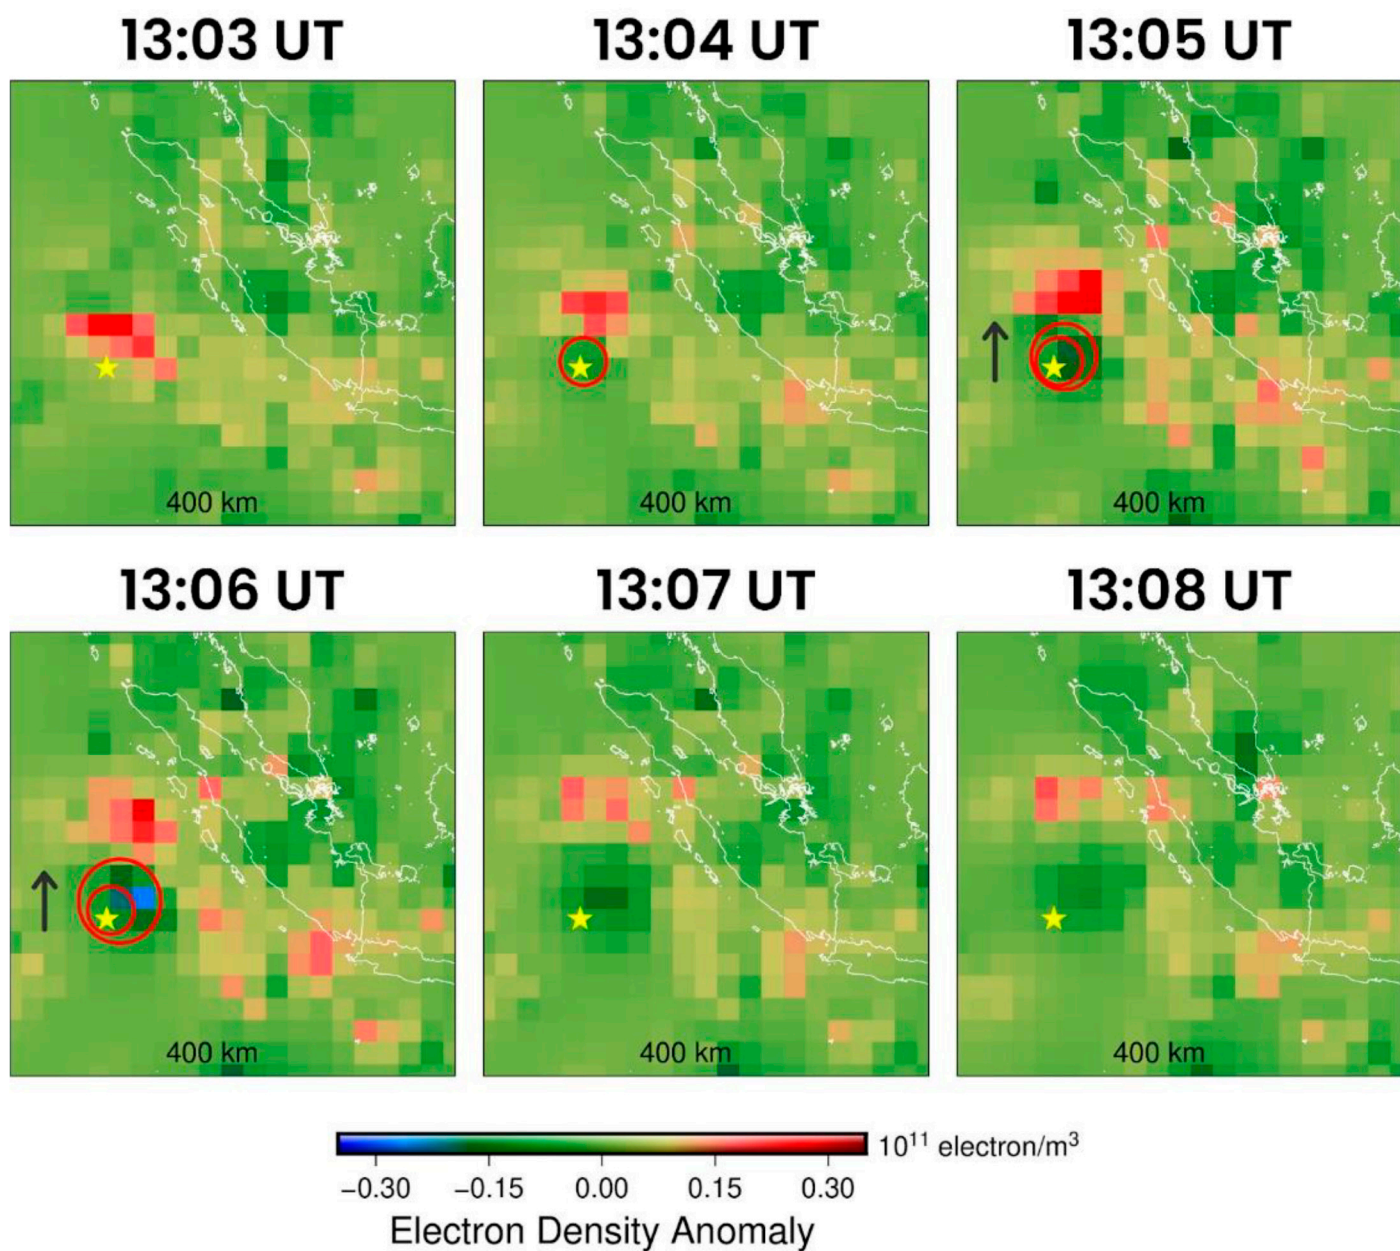

**Figure S2.** Tomography results of the 2016 West Sumatra Earthquake at an altitude of 400 km. The yellow star is the epicenter. The red circle and arrow indicate the direction and area of movement the negative CID. The negative anomaly starts to decrease at 13.04 UT.
